# Supplementary material for: The regulation of hydroboration of olefins by oriented external electric field
Source: Royal Society of Chemistry journal article supplement (doi:10.1039/c8nj04720k), 2018-01-01
Supplement: c8nj04720k1.pdf [file c8nj04720k1.pdf]

# The Regulation of Hydroboration of Olefins by Oriented External

## Electric Field

Mingxia Zhang<sup>a</sup>, Fengyi Zhang<sup>a</sup>, Hongliang Xu<sup>a,\*</sup> and Zhongmin Su<sup>a,b,\*</sup>

<sup>a</sup> Institute of Functional Material Chemistry, Department of Chemistry, National & Local United Engineering Lab for Power Battery, Northeast Normal University, Changchun 130024, Jilin, People's Republic of China.

<sup>b</sup> School of Chemistry & Environmental Engineering, Changchun University of Science and Technology, Changchun, Jilin 130012, P. R. China

## Contents

### 1. Coordinates of structures:

1.1 In gas phase (Page 2~6)

1.2 In OEEF (Page 7~30)

### 2. The number of imaginary frequencies of structures:

2.1 Table S1 (Page 31)

2.2 Table S2 (Page 32)

### 3. Total energies (with ZPE) of optimized structures:

3.1 Table S3 (Page 33)

3.2 Table S4 (Page 34)

### 4. The relative energies of stationary points:

4.1 Table S5 (Page 35)

4.2 Table S6 (Page 36)

4.3 Table S7 (Page 37)

### 5. The variations of charge quantity of carbon atoms with the change of electric field:

5.1 Fig S1 (Page 38)

### 6. The frontier molecular orbitals of the stationary points along potential energy surface in the hydroboration reactions of C<sub>3</sub>H<sub>6</sub> with BH<sub>3</sub>:

6.1 Fig S2 (Page 39)

### 7. Frontier molecular orbitals of precursor complex Q(A-M) along potential energy surface in hydroboration reactions of C<sub>3</sub>H<sub>6</sub> with BH<sub>3</sub> in presence of field:

7.1 Fig S3 (Page 40)



## 1. Coordinates of structures in gas phase:

### *Hydroboration of C<sub>2</sub>H<sub>4</sub> with BH<sub>3</sub>*

#### **C<sub>2</sub>H<sub>4</sub>:**

C,0,-0.0423144608,0.0069985627,-0.725843711  
C,0,-0.0924835106,0.0004835503,0.6223372936  
H,0,-0.0088431545,-0.9239043601,-1.3014542928  
H,0,-0.1013880157,-0.93589998,1.1900733093  
H,0,-0.126313266,0.9313465194,1.1981570637  
H,0,-0.0337376825,0.9433836377,-1.2933131628

#### **BH<sub>3</sub>:**

B,0,1.9954603302,0.0326793967,-0.0425141941  
H,0,2.0956159553,1.0751434914,0.5545129546  
H,0,1.7689013595,0.037859288,-1.2264617578  
H,0,2.119981625,-1.0132433361,0.5440796472

#### **Q:**

C,0,-0.0661804712,0.1147204107,-0.6653517503  
C,0,-0.0445269625,-0.0941259642,0.6890741569  
H,0,-0.1964884141,-0.7184415439,-1.3588505933  
H,0,-0.1570623997,-1.0980740541,1.1032114288  
H,0,-0.0423675858,0.7402785658,1.3939349135  
B,0,1.8575271115,0.0922786728,-0.0061069416  
H,0,2.0861557411,1.2664986164,0.171057693  
H,0,2.1074742048,-0.3708660786,-1.1011409815  
H,0,2.1392065279,-0.6774918338,0.8906711192  
H,0,-0.0820731419,1.1226680289,-1.0858797248

#### **TS:**

C,0,0.0710319656,0.0092750769,-0.7483037448  
C,0,0.0304562107,0.002203966,0.6542946442  
H,0,-0.0453407883,-0.9175176557,-1.3149859042

H,0,-0.1467590327,-0.9335869078,1.1852145448  
H,0,-0.1723658291,0.927804579,1.1938675295  
B,0,1.7436135463,0.0284336868,0.0909246378  
H,0,2.1596456739,1.0984918652,0.4635537188  
H,0,1.8164006993,0.0351304763,-1.1523967346  
H,0,2.1890450851,-1.0331092428,0.4537978953  
H,0,-0.0708483508,0.9377209259,-1.3063934369

**P:**

C,0,0.02032524,-0.01807811,-0.83698015  
C,0,-0.00306375,-0.04011847,0.72448564  
H,0,-0.97855929,-0.2527402,-1.24192728  
H,0,-0.32981105,-1.04201522,1.05502062  
H,0,-0.74615072,0.69877866,1.07332385  
B,0,1.46621489,0.30652225,1.18962411  
H,0,1.81209754,1.45685338,1.3359701  
H,0,0.72907426,-0.76245876,-1.24177747  
H,0,2.29548312,-0.56551854,1.31676335  
H,0,0.31360967,0.9743514,-1.22345281

***Hydroboration of C<sub>3</sub>H<sub>6</sub> with BH<sub>3</sub>***

**C<sub>3</sub>H<sub>6</sub>:**

C,0,-0.0953659904,0.0174469189,-0.6812914531  
C,0,0.1023030396,-0.0150175795,0.6529379815  
H,0,-0.2679421667,-0.9277376878,-1.2142091705  
H,0,0.0938214649,-0.9581902654,1.2079286719  
C,0,-0.0978244721,1.2751802368,-1.5205474978  
H,0,0.6846807128,1.2297656491,-2.2995571234  
H,0,-1.0661512238,1.4007416893,-2.0379392829  
H,0,0.0823560516,2.1680501549,-0.8983420197  
H,0,0.2788615839,0.9026558837,1.226136894

**Q(A-M):**

C,0,-0.1160042904,0.0088749634,-0.6666557556  
C,0,-0.0349411841,-0.0796655695,0.6999982375  
H,0,-0.2901000055,-0.9096358264,-1.2368764768  
H,0,-0.1786891907,-1.0332823816,1.2104016099  
B,0,1.8524751379,-0.1382066991,-0.0268515297  
H,0,2.1820669534,1.0149987092,0.1371157038  
H,0,1.9834669127,-0.566584098,-1.1580055095  
H,0,2.1431982196,-0.9567741599,0.8188782214  
C,0,-0.1864030019,1.3081993575,-1.4342293875  
H,0,0.5050020343,1.2993024022,-2.2917999317  
H,0,-1.2128714541,1.4379278678,-1.8218212142  
H,0,0.0597336755,2.1639278617,-0.786377421  
H,0,0.0137863532,0.8203917728,1.3190969234

**TSM:**

C,0,0.0955230208,0.0505995351,-0.7264010165  
C,0,0.1169118561,0.0470165582,0.6864218017  
H,0,-0.165466689,-0.8920847194,-1.2150998144  
H,0,-0.1013963865,-0.8637561656,1.2492693465  
B,0,1.7620367815,-0.1055447766,-0.1413606908  
H,0,2.1281929445,-1.2196138642,-0.4248778127  
H,0,1.780496077,-0.0508288737,1.1114162031  
H,0,2.3119068986,0.9046630616,-0.5055854729  
C,0,-0.1705184176,1.3215999261,-1.5186703658  
H,0,0.3829850947,1.3164336188,-2.4716932405  
H,0,-1.2478806172,1.4182169435,-1.7458146303  
H,0,0.1470254392,2.2101188157,-0.9475423288  
H,0,0.0196799978,0.9861989405,1.2397590214

**PM:**

C,0,0.0529663124,0.0846076782,-0.7904092712

C,0,-0.0217633969,-0.0401668521,0.7638831451  
H,0,-0.5731985122,-0.7272623098,-1.207761561  
H,0,0.3123478524,-1.0309987991,1.1192877174  
B,0,1.5790355837,-0.1612579885,-1.1210184275  
H,0,2.0202411961,-1.284920196,-1.198937117  
H,0,0.5995870574,0.7298265127,1.2585009961  
H,0,2.3441359433,0.7733568768,-1.2111878673  
C,0,-0.5034186014,1.4492081852,-1.2429943632  
H,0,-0.4718018638,1.55738595,-2.3417292022  
H,0,-1.5537138147,1.5812624875,-0.9229469572  
H,0,0.0902735228,2.2747211206,-0.8093862727  
H,0,-1.0630893292,0.1074694045,1.1025740107

**TSAM:**

C,0,-0.0369026483,0.0501723799,-0.7258367316  
C,0,-0.0388471622,0.0440796914,0.6807384111  
H,0,-0.2187546134,-0.8954226212,-1.2469699462  
H,0,-0.2862745174,-0.8707266007,1.2203428052  
B,0,1.6524016837,-0.0599760265,0.1067358762  
H,0,2.1553226813,0.99368079,0.4218317952  
H,0,1.6858340341,-0.1057005598,-1.1360606528  
H,0,2.045844495,-1.1356881445,0.4902481962  
C,0,-0.2430494948,1.3206022904,-1.5245690425  
H,0,0.230279965,1.2601195807,-2.5170647601  
H,0,-1.3277295114,1.4793197811,-1.6594278655  
H,0,0.1719251919,2.1851984181,-0.9820137272  
H,0,-0.1782311635,0.987425681,1.2134405521

**PAM:**

C,0,0.0447695142,-0.0010465388,-0.7900287979  
C,0,0.0160082302,-0.0109542736,0.7705005424  
H,0,0.0038422647,-1.0389426298,-1.1714489636

H,0,-0.948515836,-0.4442294294,1.0939339281  
B,0,1.25605984,-0.8635619934,1.2520402388  
H,0,2.3371056838,-0.3451314301,1.415900375  
H,0,1.0015397969,0.4277325691,-1.1437655512  
H,0,1.1685824946,-2.0634272607,1.3822722069  
C,0,-1.1225096662,0.8042692768,-1.3866374138  
H,0,-1.0873602738,0.8011945891,-2.4902052343  
H,0,-2.0919331882,0.3775685912,-1.0736231926  
H,0,-1.0874360269,1.854219283,-1.045745749  
H,0,0.0586205867,1.0365665768,1.1219451411

**Coordinates of structures in OEEF ( $\times 10^{-4}$  a.u.):**

*Hydroboration of  $C_2H_4$  with  $BH_3$*

1)  $F_Z = 20$

**$C_2H_4$ :**

|   |                 |                 |                 |
|---|-----------------|-----------------|-----------------|
| C | -0.024323172262 | 0.005460590025  | -0.725828887127 |
| C | -0.066356066948 | -0.000492112431 | 0.622578795261  |
| H | 0.008316038898  | -0.925151474761 | -1.301612930722 |
| H | -0.073136510891 | -0.936835651629 | 1.190867429787  |
| H | -0.097960051927 | 0.930829476648  | 1.198200950671  |
| H | -0.016630236870 | 0.941123172146  | -1.294249357871 |

**$BH_3$ :**

|   |                |                 |                 |
|---|----------------|-----------------|-----------------|
| B | 1.995447162808 | 0.032849066251  | -0.043424536902 |
| H | 2.095618649667 | 1.075146883503  | 0.555237017575  |
| H | 1.769060703012 | 0.037434072308  | -1.226397687110 |
| H | 2.119832484512 | -1.012991022068 | 0.544201206420  |

**Q:**

|   |                 |                 |                 |
|---|-----------------|-----------------|-----------------|
| C | -0.062256393974 | -0.037817606229 | -0.669974392942 |
| C | -0.049635399740 | 0.102161671328  | 0.693574577918  |
| H | -0.034312561070 | -1.022533679544 | -1.142059422405 |
| H | -0.016305467347 | -0.766916559548 | 1.354198464639  |
| H | -0.204444838038 | 1.078469480032  | 1.157119480161  |
| B | 1.857655025394  | 0.034163121351  | -0.000374120824 |
| H | 2.118671546415  | 0.823965867003  | 0.885044709746  |
| H | 2.073774368427  | 0.496244068089  | -1.103020092295 |
| H | 2.138363922342  | -1.129326815491 | 0.173899861074  |
| H | -0.226636202372 | 0.822895452321  | -1.321328065289 |

**TS:**

|   |                |                |                 |
|---|----------------|----------------|-----------------|
| C | 0.063124736738 | 0.009230462289 | -0.747367851473 |
| C | 0.026473165188 | 0.002120005055 | 0.653206712937  |



|   |                 |                 |                 |
|---|-----------------|-----------------|-----------------|
| H | -0.048590951120 | -0.917563386063 | -1.314818582161 |
| H | -0.144161779806 | -0.934017053604 | 1.185866729839  |
| H | -0.169722647563 | 0.928105659827  | 1.194768490189  |
| B | 1.746991141094  | 0.028521383361  | 0.083418743829  |
| H | 2.157167273485  | 1.097184473286  | 0.468366504132  |
| H | 1.829888033871  | 0.035432246496  | -1.156133866864 |
| H | 2.186571469428  | -1.031943714121 | 0.458406922393  |
| H | -0.073987441316 | 0.937837923462  | -1.306108802829 |

**P:**

|   |                 |                 |                 |
|---|-----------------|-----------------|-----------------|
| C | 0.015612304988  | 0.004920892921  | -0.836765295206 |
| C | -0.002428057606 | 0.027550224719  | 0.725775688411  |
| H | 0.208562027837  | -1.010795131842 | -1.225096366365 |
| H | -0.814623278925 | -0.634676366057 | 1.074928208573  |
| H | -0.227575346701 | 1.057098460992  | 1.056894811391  |
| B | 1.426018025280  | -0.463090574806 | 1.184950168531  |
| H | 2.339358018099  | 0.321566490248  | 1.308372127770  |
| H | 0.792505788948  | 0.676576844050  | -1.242597981087 |
| H | 1.655264162352  | -1.641522287857 | 1.339820722087  |
| H | -0.956437244715 | 0.336935756565  | -1.238127813849 |

2)  $F_Z = -20$

**C<sub>2</sub>H<sub>4</sub>:**

|   |                 |                 |                 |
|---|-----------------|-----------------|-----------------|
| C | -0.024450355838 | 0.005458292410  | -0.726335193447 |
| C | -0.066610347896 | -0.000494652396 | 0.622057411723  |
| H | 0.008414764734  | -0.926021127392 | -1.301367449783 |
| H | -0.073044423133 | -0.935948854819 | 1.191136197317  |
| H | -0.097856530511 | 0.929944379222  | 1.198445819023  |
| H | -0.016543107357 | 0.941995962967  | -1.293980784833 |

**BH<sub>3</sub>:**

|   |                |                |                 |
|---|----------------|----------------|-----------------|
| B | 1.994127182532 | 0.032832399661 | -0.041425318895 |
|---|----------------|----------------|-----------------|

|   |                |                 |                 |
|---|----------------|-----------------|-----------------|
| H | 2.096057988925 | 1.075154336707  | 0.554568295825  |
| H | 1.769500232083 | 0.037442338271  | -1.227061867463 |
| H | 2.120273596557 | -1.012990076761 | 0.543534893412  |

**Q:**

|   |                 |                 |                 |
|---|-----------------|-----------------|-----------------|
| C | -0.064297819897 | -0.071244939838 | -0.663586078862 |
| C | -0.046047756219 | 0.148590042838  | 0.689452214814  |
| H | -0.054817048224 | -1.082727403072 | -1.075376067170 |
| H | -0.016210749325 | -0.679825971918 | 1.400865846432  |
| H | -0.188765386603 | 1.151176735808  | 1.097574200947  |
| B | 1.856055914664  | 0.017556653568  | -0.015287088709 |
| H | 2.101316344152  | 0.743319986842  | 0.927959153097  |
| H | 2.104771755513  | 0.552388686502  | -1.077573191615 |
| H | 2.125242077775  | -1.154752067119 | 0.109196202500  |
| H | -0.222374331952 | 0.752823278307  | -1.362144186394 |

**TS:**

|   |                 |                 |                 |
|---|-----------------|-----------------|-----------------|
| C | 0.078048429372  | 0.009453700466  | -0.749234096701 |
| C | 0.034135853671  | 0.001982060641  | 0.655272967942  |
| H | -0.042968838611 | -0.917001147007 | -1.315821372818 |
| H | -0.149198309408 | -0.933625716088 | 1.184444227251  |
| H | -0.175313800342 | 0.927077887206  | 1.193099276114  |
| B | 1.740494913103  | 0.028510435107  | 0.098110107048  |
| H | 2.161592007245  | 1.100006646551  | 0.458843907020  |
| H | 1.803513317031  | 0.034169580705  | -1.148857718023 |
| H | 2.191157545897  | -1.033992983537 | 0.449998563462  |
| H | -0.067708117959 | 0.938327535948  | -1.306250861316 |

**P:**

|   |                 |                 |                 |
|---|-----------------|-----------------|-----------------|
| C | 0.015495686130  | 0.005061531245  | -0.835745605548 |
| C | -0.003312985532 | 0.027370745040  | 0.724982989956  |
| H | 0.208997515923  | -1.011430159712 | -1.223580949538 |
| H | -0.815111350916 | -0.634228342935 | 1.075204213348  |

|   |                 |                 |                 |
|---|-----------------|-----------------|-----------------|
| H | -0.228492854598 | 1.056043872226  | 1.057580410400  |
| B | 1.425937984408  | -0.463077803768 | 1.189132512908  |
| H | 2.338827575918  | 0.322516393828  | 1.303540716952  |
| H | 0.794592175972  | 0.676087048138  | -1.240544128358 |
| H | 1.655080476753  | -1.641587752240 | 1.337728591040  |
| H | -0.955757824073 | 0.337808778223  | -1.240144481102 |

3)  $F_X = 20$

**C<sub>2</sub>H<sub>4</sub>:**

|   |                 |                 |                 |
|---|-----------------|-----------------|-----------------|
| C | -0.019996000891 | 0.005497307839  | -0.725748049926 |
| C | -0.063573341649 | -0.000430088927 | 0.622610232926  |
| H | 0.006293822138  | -0.925689387584 | -1.301358633052 |
| H | -0.074664257955 | -0.936644432884 | 1.190502428525  |
| H | -0.099550527385 | 0.930617164662  | 1.197904093533  |
| H | -0.018599694263 | 0.941583436894  | -1.293954072001 |

**BH<sub>3</sub>:**

|   |                |                 |                 |
|---|----------------|-----------------|-----------------|
| B | 1.992079589168 | 0.033006056851  | -0.042383470123 |
| H | 2.096788333771 | 1.074734009819  | 0.555122919200  |
| H | 1.770166754745 | 0.037172623611  | -1.226859114853 |
| H | 2.120924322319 | -1.012473690124 | 0.543734666026  |

**Q:**

|   |                 |                 |                 |
|---|-----------------|-----------------|-----------------|
| C | -0.059107540759 | -0.048013649834 | -0.668684316374 |
| C | -0.045242164493 | 0.112919275963  | 0.692994194851  |
| H | -0.038630671857 | -1.040477895793 | -1.124283478947 |
| H | -0.012945130543 | -0.746096255463 | 1.366787918499  |
| H | -0.203429632267 | 1.095265778032  | 1.142262631247  |
| B | 1.848803773701  | 0.032906273396  | -0.007562082271 |
| H | 2.108894835263  | 0.784641157290  | 0.911656573702  |
| H | 2.087015102611  | 0.541200501287  | -1.085845792098 |
| H | 2.138459335638  | -1.133921824636 | 0.131041792213  |

|            |                 |                 |                 |
|------------|-----------------|-----------------|-----------------|
| H          | -0.228942907391 | 0.802879641598  | -1.331285441078 |
| <b>TS:</b> |                 |                 |                 |
| C          | 0.073428532986  | 0.009342339318  | -0.749196458972 |
| C          | 0.034971201661  | 0.002271296219  | 0.654787190876  |
| H          | -0.045955708754 | -0.917364277793 | -1.315447774917 |
| H          | -0.150743487306 | -0.933448333699 | 1.182971184377  |
| H          | -0.176447250983 | 0.927550055960  | 1.191630604350  |
| B          | 1.741463992506  | 0.028355146539  | 0.096216158746  |
| H          | 2.166144724468  | 1.097958602350  | 0.462433015370  |
| H          | 1.807084638414  | 0.035315061295  | -1.149126630726 |
| H          | 2.195432001370  | -1.032694247859 | 0.452146158803  |
| H          | -0.071626644388 | 0.937621357666  | -1.306808448333 |

**P:**

|   |                 |                 |                 |
|---|-----------------|-----------------|-----------------|
| C | 0.016397897211  | 0.003429084243  | -0.835341246710 |
| C | -0.003248092532 | 0.028833198905  | 0.726678777985  |
| H | 0.205952969596  | -1.014060670647 | -1.221511462759 |
| H | -0.815737071712 | -0.632269192152 | 1.075645181116  |
| H | -0.229110546413 | 1.058177132482  | 1.056468015048  |
| B | 1.424020429986  | -0.461995978060 | 1.186295274623  |
| H | 2.337441754096  | 0.323459227803  | 1.313676891878  |
| H | 0.796017332058  | 0.672503575486  | -1.242140610893 |
| H | 1.658817509833  | -1.641345917142 | 1.326154024089  |
| H | -0.954295182202 | 0.337833538863  | -1.237769844350 |

**4)  $F_x = -20$**

**C<sub>2</sub>H<sub>4</sub>:**

|   |                 |                 |                 |
|---|-----------------|-----------------|-----------------|
| C | -0.026142539172 | 0.005412570011  | -0.726094030814 |
| C | -0.069244127777 | -0.000512210628 | 0.622237418346  |
| H | 0.009325480098  | -0.925708212944 | -1.301242677455 |
| H | -0.071786536993 | -0.936465444190 | 1.190743191036  |

|   |                 |                |                 |
|---|-----------------|----------------|-----------------|
| H | -0.096681963101 | 0.930520002662 | 1.198142227094  |
| H | -0.015559313055 | 0.941686295089 | -1.293830128207 |

**BH<sub>3</sub>:**

|   |                |                 |                 |
|---|----------------|-----------------|-----------------|
| B | 1.997921497444 | 0.033051925201  | -0.042734000202 |
| H | 2.094792507055 | 1.075124349565  | 0.555008386882  |
| H | 1.768307523588 | 0.037158123718  | -1.226279001625 |
| H | 2.118937471900 | -1.012896398323 | 0.543620614447  |

**Q:**

|   |                 |                 |                 |
|---|-----------------|-----------------|-----------------|
| C | -0.069721650038 | -0.058078023665 | -0.665468693883 |
| C | -0.053572285292 | 0.136397894403  | 0.690472953894  |
| H | -0.046059417295 | -1.060965148968 | -1.097761195320 |
| H | -0.017599545758 | -0.704667645546 | 1.386538541561  |
| H | -0.195043334446 | 1.131856706471  | 1.116338710277  |
| B | 1.869067215906  | 0.018312862892  | -0.006590000728 |
| H | 2.116352177602  | 0.790167616259  | 0.897474330371  |
| H | 2.091693315329  | 0.497362968061  | -1.100015660117 |
| H | 2.123441043054  | -1.151187940235 | 0.160702929746  |
| H | -0.223684519053 | 0.778106710094  | -1.350610915482 |

**TS:**

|   |                 |                 |                 |
|---|-----------------|-----------------|-----------------|
| C | 0.067982460860  | 0.009344562707  | -0.747399141873 |
| C | 0.025381363641  | 0.002017476394  | 0.653789987717  |
| H | -0.045024811923 | -0.917411025128 | -1.314786663500 |
| H | -0.143131689881 | -0.933966259479 | 1.187281789026  |
| H | -0.168651767108 | 0.927841658644  | 1.196266639747  |
| B | 1.746036321429  | 0.028527648056  | 0.085546571507  |
| H | 2.153053321507  | 1.098984488284  | 0.465009291372  |
| H | 1.825908431164  | 0.035049400785  | -1.155766057446 |
| H | 2.182537255278  | -1.033577112653 | 0.455509800716  |
| H | -0.070337885152 | 0.938098162028  | -1.305847220325 |

**P:**

|   |                 |                 |                 |
|---|-----------------|-----------------|-----------------|
| C | 0.014573284004  | 0.005723789095  | -0.836898363957 |
| C | -0.002382527767 | 0.027182767160  | 0.724294907799  |
| H | 0.211797414023  | -1.009306856447 | -1.225608482117 |
| H | -0.814406642077 | -0.634688147379 | 1.075336709491  |
| H | -0.226185680370 | 1.056392107345  | 1.057382356058  |
| B | 1.427675654407  | -0.463969485102 | 1.187989024101  |
| H | 2.339799959305  | 0.320771401303  | 1.304320114711  |
| H | 0.790643875738  | 0.679064996695  | -1.241906494920 |
| H | 1.652791332250  | -1.642147648737 | 1.343867060518  |
| H | -0.958049668573 | 0.335542077032  | -1.240621833031 |

***Hydroboration of C<sub>3</sub>H<sub>6</sub> with BH<sub>3</sub>***

1) **F<sub>Z</sub> = 10**

**C<sub>3</sub>H<sub>6</sub>:**

|   |                 |                 |                 |
|---|-----------------|-----------------|-----------------|
| C | -0.095007036566 | 0.017770854932  | -0.681413048242 |
| C | 0.102783421104  | -0.015215802727 | 0.652947372218  |
| H | -0.267885658197 | -0.927114659716 | -1.214376275456 |
| H | 0.094106932134  | -0.958659936304 | 1.207776031998  |
| C | -0.097920059801 | 1.275379075247  | -1.520338438576 |
| H | 0.684271148359  | 1.229987606684  | -2.299329126516 |
| H | -1.066140265793 | 1.399826613168  | -2.038185982862 |
| H | 0.081127405470  | 2.168350316916  | -0.898105969371 |
| H | 0.279402872019  | 0.902571630924  | 1.226143796073  |

**BH<sub>3</sub>:**

|   |                |                 |                 |
|---|----------------|-----------------|-----------------|
| B | 1.995116747061 | 0.032844951747  | -0.042926811865 |
| H | 2.095726459779 | 1.075141101480  | 0.555058670523  |
| H | 1.769175218804 | 0.037436073135  | -1.226539475053 |
| H | 2.119940574354 | -1.012983126435 | 0.544023616202  |

**Q(A-M):**

|   |                 |                |                 |
|---|-----------------|----------------|-----------------|
| C | -0.113543332363 | 0.009258751274 | -0.667385564059 |
|---|-----------------|----------------|-----------------|

|   |                 |                 |                 |
|---|-----------------|-----------------|-----------------|
| C | -0.034340323724 | -0.074977738796 | 0.699807317621  |
| H | -0.284402657739 | -0.911256669945 | -1.235268887899 |
| H | -0.177294944966 | -1.027309144222 | 1.212692957268  |
| B | 1.854099836802  | -0.139936458260 | -0.021830013412 |
| H | 2.188506280081  | 1.009032723104  | 0.160705090797  |
| H | 1.983651909688  | -0.548715876699 | -1.159454914186 |
| H | 2.142044666490  | -0.973821597575 | 0.809588525364  |
| C | -0.188352225620 | 1.306290313549  | -1.437965763871 |
| H | 0.492680384666  | 1.293597390821  | -2.303473562133 |
| H | -1.218824062945 | 1.435996804788  | -1.814674227577 |
| H | 0.065707504460  | 2.163798225994  | -0.795416024637 |
| H | 0.010787124536  | 0.827517476475  | 1.315548536336  |

**TSM:**

|   |                 |                 |                 |
|---|-----------------|-----------------|-----------------|
| C | 0.098449512369  | 0.050590146796  | -0.727810899768 |
| C | 0.119042987265  | 0.047372469288  | 0.685820922356  |
| H | -0.164022008970 | -0.892100762301 | -1.215722123112 |
| H | -0.101746022653 | -0.862999150770 | 1.248516041397  |
| B | 1.762113133692  | -0.106035995013 | -0.142495355685 |
| H | 2.129741247274  | -1.221127713103 | -0.419226046347 |
| H | 1.775086860992  | -0.048712667009 | 1.111691500179  |
| H | 2.315002518252  | 0.903744529355  | -0.502611826821 |
| C | -0.170888455877 | 1.321514900977  | -1.519309716442 |
| H | 0.377161413516  | 1.315440699195  | -2.475351289363 |
| H | -1.249282929978 | 1.417884376751  | -1.741217837682 |
| H | 0.149678905994  | 2.210391155575  | -0.950457799926 |
| H | 0.019158838683  | 0.987057011457  | 1.237995433069  |

**PM:**

|   |                 |                 |                 |
|---|-----------------|-----------------|-----------------|
| C | 0.052946083126  | 0.084872903333  | -0.790530718282 |
| C | -0.021753282671 | -0.040408468078 | 0.763495741452  |
| H | -0.572894489956 | -0.726992881873 | -1.208164076827 |

|   |                 |                 |                 |
|---|-----------------|-----------------|-----------------|
| H | 0.311728559636  | -1.031785189772 | 1.118373900927  |
| B | 1.579295689914  | -0.161180766976 | -1.121738640961 |
| H | 2.020748246166  | -1.285031161844 | -1.193862461376 |
| H | 0.600551810584  | 0.729027570005  | 1.258192358846  |
| H | 2.343926020271  | 0.773490099497  | -1.213924201349 |
| C | -0.503710575032 | 1.449367840351  | -1.242838538789 |
| H | -0.472574344650 | 1.557359893692  | -2.341340162592 |
| H | -1.554020878211 | 1.581291518421  | -0.922631957776 |
| H | 0.090309502849  | 2.274998089590  | -0.809726535672 |
| H | -1.062950391060 | 0.108222623633  | 1.102570122792  |

**TSAM:**

|   |                 |                 |                 |
|---|-----------------|-----------------|-----------------|
| C | -0.039872991447 | 0.051071691392  | -0.725797466958 |
| C | -0.039909044468 | 0.044481276495  | 0.679905119171  |
| H | -0.218737416392 | -0.894832024954 | -1.247354296826 |
| H | -0.285259609737 | -0.870686240013 | 1.219912004619  |
| B | 1.654281826758  | -0.060939989664 | 0.104612106157  |
| H | 2.155815084816  | 0.991605444302  | 0.426703817908  |
| H | 1.693141387422  | -0.105213498092 | -1.136645227732 |
| H | 2.044463027459  | -1.136601630041 | 0.492678823988  |
| C | -0.244563714426 | 1.321097399971  | -1.525036345649 |
| H | 0.227001905795  | 1.259089976642  | -2.517994103269 |
| H | -1.329242624761 | 1.480293124559  | -1.659123870907 |
| H | 0.171653324622  | 2.185868254696  | -0.983738069130 |
| H | -0.176952215682 | 0.987850874757  | 1.213272418634  |

**PAM:**

|   |                 |                 |                 |
|---|-----------------|-----------------|-----------------|
| C | 0.044849917905  | -0.001323640676 | -0.790433644445 |
| C | 0.016862004033  | -0.009937578774 | 0.770561927796  |
| H | 0.003634602903  | -1.039412489225 | -1.170847617917 |
| H | -0.947988872771 | -0.442766312705 | 1.093951876219  |
| B | 1.256126531813  | -0.863324733587 | 1.250887203294  |



|   |                 |                 |                 |
|---|-----------------|-----------------|-----------------|
| H | 2.336544722332  | -0.345399658632 | 1.421655361406  |
| H | 1.001323571086  | 0.427103907895  | -1.145034562614 |
| H | 1.168152611873  | -2.063638184993 | 1.378498213838  |
| C | -1.122879469152 | 0.803814366908  | -1.386304281632 |
| H | -1.087887361736 | 0.800461595277  | -2.489584398524 |
| H | -2.092126175050 | 0.376733209345  | -1.073154901929 |
| H | -1.087716567121 | 1.853911130148  | -1.045786682721 |
| H | 0.059877903959  | 1.038035719022  | 1.120729037214  |

2)  $F_z = -10$

**C<sub>3</sub>H<sub>6</sub>:**

|   |                 |                 |                 |
|---|-----------------|-----------------|-----------------|
| C | -0.094280422375 | 0.016710207943  | -0.681861269906 |
| C | 0.103155212512  | -0.015076818986 | 0.652366000266  |
| H | -0.267477752547 | -0.928478164459 | -1.214437894823 |
| H | 0.093861069523  | -0.957545653449 | 1.208474491494  |
| C | -0.097944212073 | 1.275022760421  | -1.520551311256 |
| H | 0.684436807286  | 1.231397861582  | -2.299981304231 |
| H | -1.067063208883 | 1.400913485628  | -2.036981959909 |
| H | 0.081357852729  | 2.167217883967  | -0.897413366845 |
| H | 0.278693412185  | 0.902734136792  | 1.225504974782  |

**BH<sub>3</sub>:**

|   |                |                 |                 |
|---|----------------|-----------------|-----------------|
| B | 1.994456730883 | 0.032836618278  | -0.041927188493 |
| H | 2.095946130742 | 1.075144854802  | 0.554724268116  |
| H | 1.769395006257 | 0.037440205333  | -1.226871495344 |
| H | 2.120161132163 | -1.012982679545 | 0.543690416972  |

**Q(A-M):**

|   |                 |                 |                 |
|---|-----------------|-----------------|-----------------|
| C | -0.119326546407 | 0.010265945809  | -0.665034480059 |
| C | -0.037471957913 | -0.081632685488 | 0.700763546448  |
| H | -0.294946309117 | -0.906860791403 | -1.237038809097 |
| H | -0.179212308773 | -1.036554140908 | 1.209285403853  |

|   |                 |                 |                 |
|---|-----------------|-----------------|-----------------|
| B | 1.856046550246  | -0.140183341737 | -0.033576585213 |
| H | 2.181222809969  | 1.016408750419  | 0.112175421624  |
| H | 1.986475155204  | -0.589743578908 | -1.156374222352 |
| H | 2.142979102780  | -0.940605853364 | 0.829746976048  |
| C | -0.186856839502 | 1.311024676025  | -1.430799343636 |
| H | 0.517445656128  | 1.308089437877  | -2.278136561898 |
| H | -1.208338192835 | 1.436312091357  | -1.832906390984 |
| H | 0.045438720842  | 2.166782937535  | -0.777927972495 |
| H | 0.017264319327  | 0.816170755154  | 1.322696489672  |

**TSM:**

|   |                 |                 |                 |
|---|-----------------|-----------------|-----------------|
| C | 0.093236350947  | 0.050739414108  | -0.724744655354 |
| C | 0.114691173098  | 0.048066149078  | 0.687416108231  |
| H | -0.166954697785 | -0.892391475271 | -1.213023197319 |
| H | -0.101939040028 | -0.862517428544 | 1.251082030371  |
| B | 1.761679511949  | -0.105119198732 | -0.139221379356 |
| H | 2.126541642617  | -1.218481402590 | -0.427708382519 |
| H | 1.785438262124  | -0.051489682227 | 1.112122439165  |
| H | 2.309484360603  | 0.904828283682  | -0.507962728643 |
| C | -0.169787801790 | 1.320732024976  | -1.519497741316 |
| H | 0.389862646063  | 1.315534257529  | -2.469228906680 |
| H | -1.245982983543 | 1.415755528047  | -1.753199534685 |
| H | 0.142920963144  | 2.210181506931  | -0.947316117759 |
| H | 0.020305612490  | 0.987181022297  | 1.241103065034  |

**PM:**

|   |                 |                 |                 |
|---|-----------------|-----------------|-----------------|
| C | 0.052805027064  | 0.084250039643  | -0.790515772907 |
| C | -0.021328784264 | -0.039813799941 | 0.764207046268  |
| H | -0.573669865419 | -0.727900603252 | -1.207035225529 |
| H | 0.311482089481  | -1.030826170581 | 1.119822891048  |
| B | 1.578710931821  | -0.161324716461 | -1.119835175511 |
| H | 2.020432797349  | -1.284760123438 | -1.199503160094 |

|   |                 |                |                 |
|---|-----------------|----------------|-----------------|
| H | 0.600854377499  | 0.729443810325 | 1.258556064416  |
| H | 2.343311892213  | 0.773684450042 | -1.212422415927 |
| C | -0.503484737234 | 1.448839990688 | -1.243361146939 |
| H | -0.469986862976 | 1.557806711566 | -2.342222561796 |
| H | -1.554204490661 | 1.580427472135 | -0.924709770139 |
| H | 0.088990167886  | 2.274255237578 | -0.808077415926 |
| H | -1.062310592943 | 0.109149771298 | 1.102971472637  |

**TSAM:**

|   |                 |                 |                 |
|---|-----------------|-----------------|-----------------|
| C | -0.033867853348 | 0.049452669909  | -0.725898314634 |
| C | -0.037756062632 | 0.043914376107  | 0.681526223237  |
| H | -0.218490745973 | -0.895912180038 | -1.246612612657 |
| H | -0.287420714259 | -0.870458883332 | 1.220771872289  |
| B | 1.650611574736  | -0.059341841820 | 0.109038416354  |
| H | 2.155134771496  | 0.995005868813  | 0.418145292439  |
| H | 1.678927158297  | -0.105511054456 | -1.135257477636 |
| H | 2.046781845012  | -1.135493695431 | 0.487424195931  |
| C | -0.241626337849 | 1.320157985218  | -1.524293938671 |
| H | 0.233128046756  | 1.261042885064  | -2.516440358093 |
| H | -1.326319657146 | 1.478199910391  | -1.659666351783 |
| H | 0.172095032394  | 2.184731955942  | -0.980820183090 |
| H | -0.179378118330 | 0.987296664808  | 1.213478146569  |

**PAM:**

|   |                 |                 |                 |
|---|-----------------|-----------------|-----------------|
| C | 0.044667614693  | -0.000965299530 | -0.789276358874 |
| C | 0.015678747233  | -0.010703400205 | 0.770726163173  |
| H | 0.003911230486  | -1.039054177378 | -1.170612518865 |
| H | -0.948609726973 | -0.443869240165 | 1.094761530798  |
| B | 1.256076942775  | -0.863548675749 | 1.252869856941  |
| H | 2.337384475876  | -0.345052587682 | 1.413388419296  |
| H | 1.001628738074  | 0.427837337149  | -1.142899601450 |
| H | 1.168172344022  | -2.063335796836 | 1.381968400855  |

|   |                 |                |                 |
|---|-----------------|----------------|-----------------|
| C | -1.122316712304 | 0.804044591514 | -1.387052342449 |
| H | -1.086814859401 | 0.800545703822 | -2.490907909938 |
| H | -2.091882726070 | 0.377715231388 | -1.074043540579 |
| H | -1.087590847260 | 1.854070238090 | -1.046442847633 |
| H | 0.058468198858  | 1.036573405569 | 1.122658278718  |

3)  $F_Z = -57$

**C<sub>3</sub>H<sub>6</sub>:**

|   |                 |                 |                 |
|---|-----------------|-----------------|-----------------|
| C | -0.092338471113 | 0.014327214015  | -0.682878064140 |
| C | 0.103790163628  | -0.014795783225 | 0.651304198719  |
| H | -0.266232373933 | -0.931540085858 | -1.214781153821 |
| H | 0.093128915634  | -0.955096707334 | 1.210413620991  |
| C | -0.097924933774 | 1.274219603383  | -1.521156694703 |
| H | 0.684534359037  | 1.234573063394  | -2.302252181321 |
| H | -1.069351058240 | 1.403540572527  | -2.034129975321 |
| H | 0.082334108876  | 2.164712732670  | -0.896107952085 |
| H | 0.276798047977  | 0.902955089574  | 1.224706561001  |

**BH<sub>3</sub>:**

|   |                |                 |                 |
|---|----------------|-----------------|-----------------|
| B | 2.011953141265 | -0.160104314475 | -0.000268610804 |
| H | 2.152233690960 | 0.920189540500  | 0.512169180445  |
| H | 1.852953251981 | -0.239231076716 | -1.196552722608 |
| H | 2.032867915868 | -1.161596148326 | 0.666683141926  |

**Q(A-M):**

|   |                 |                 |                 |
|---|-----------------|-----------------|-----------------|
| C | -0.122819468354 | 0.011691034246  | -0.661648822545 |
| C | -0.040568169521 | -0.093017504974 | 0.702627729212  |
| H | -0.305792478624 | -0.899975666292 | -1.240335934772 |
| H | -0.181303550056 | -1.052288225977 | 1.203468820351  |
| B | 1.854067956218  | -0.139929150111 | -0.053574500229 |
| H | 2.169683728909  | 1.025111230813  | 0.029843973794  |
| H | 1.993674663698  | -0.657760661866 | -1.147711237416 |

|   |                 |                 |                 |
|---|-----------------|-----------------|-----------------|
| H | 2.137946742152  | -0.882237462043 | 0.859833696638  |
| C | -0.184380700008 | 1.319006999750  | -1.419045708415 |
| H | 0.549647311523  | 1.332421860549  | -2.241950593083 |
| H | -1.194178239370 | 1.438934214751  | -1.852267721193 |
| H | 0.018380079090  | 2.171127238039  | -0.752033743036 |
| H | 0.026361124642  | 0.796390092990  | 1.335668040976  |

**TSM:**

|   |                 |                 |                 |
|---|-----------------|-----------------|-----------------|
| C | 0.079789000000  | 0.051665000000  | -0.716818000000 |
| C | 0.103481000000  | 0.049564000000  | 0.691603000000  |
| H | -0.173965000000 | -0.892520000000 | -1.206832000000 |
| H | -0.102613000000 | -0.861952000000 | 1.257266000000  |
| B | 1.762381000000  | -0.102913000000 | -0.131208000000 |
| H | 2.118548000000  | -1.211589000000 | -0.451939000000 |
| H | 1.814071000000  | -0.060629000000 | 1.113181000000  |
| H | 2.296216000000  | 0.908210000000  | -0.520817000000 |
| C | -0.167758000000 | 1.319332000000  | -1.519479000000 |
| H | 0.420026000000  | 1.316765000000  | -2.453329000000 |
| H | -1.238107000000 | 1.409590000000  | -1.782360000000 |
| H | 0.123713000000  | 2.210370000000  | -0.939175000000 |
| H | 0.023714000000  | 0.987127000000  | 1.249730000000  |

**PM:**

|   |                 |                 |                 |
|---|-----------------|-----------------|-----------------|
| C | 0.052935111412  | 0.083503950157  | -0.790330211246 |
| C | -0.020828535657 | -0.039015990140 | 0.766276301451  |
| H | -0.574767904624 | -0.729255030351 | -1.205020422744 |
| H | 0.311990760400  | -1.028898769958 | 1.123254895369  |
| B | 1.577549012438  | -0.161518259141 | -1.116016544700 |
| H | 2.019534597136  | -1.284303680047 | -1.210869620740 |
| H | 0.599341605118  | 0.730656831117  | 1.260884289066  |
| H | 2.342984814695  | 0.773214924990  | -1.212507397057 |
| C | -0.502778433119 | 1.448299327652  | -1.244210221493 |

|   |                 |                |                 |
|---|-----------------|----------------|-----------------|
| H | -0.464303773816 | 1.559567026992 | -2.344191853479 |
| H | -1.554354115213 | 1.579111759341 | -0.928755259174 |
| H | 0.086234192946  | 2.273350068690 | -0.804281096753 |
| H | -1.061935382235 | 0.108519910995 | 1.103641971518  |

**TSAM:**

|   |                 |                 |                 |
|---|-----------------|-----------------|-----------------|
| C | -0.021398000000 | 0.046071000000  | -0.726192000000 |
| C | -0.033194000000 | 0.042694000000  | 0.685050000000  |
| H | -0.218981000000 | -0.897982000000 | -1.245155000000 |
| H | -0.291653000000 | -0.870024000000 | 1.222833000000  |
| B | 1.643816000000  | -0.056154000000 | 0.118886000000  |
| H | 2.154045000000  | 1.002061000000  | 0.399713000000  |
| H | 1.648554000000  | -0.106538000000 | -1.132464000000 |
| H | 2.051898000000  | -1.133586000000 | 0.475898000000  |
| C | -0.235717000000 | 1.318365000000  | -1.522748000000 |
| H | 0.247609000000  | 1.266277000000  | -2.512669000000 |
| H | -1.320400000000 | 1.473318000000  | -1.662556000000 |
| H | 0.171119000000  | 2.182637000000  | -0.973696000000 |
| H | -0.183879000000 | 0.985946000000  | 1.214494000000  |

**PAM:**

|   |                 |                 |                 |
|---|-----------------|-----------------|-----------------|
| C | 0.044245348974  | -0.000298697018 | -0.786128824812 |
| C | 0.014576204724  | -0.009554117413 | 0.771672926077  |
| H | 0.004354609369  | -1.039261448935 | -1.167306110792 |
| H | -0.948619080082 | -0.442308073279 | 1.098452094744  |
| B | 1.256285012365  | -0.864067410471 | 1.256921530997  |
| H | 2.338206670518  | -0.345309929651 | 1.405719388542  |
| H | 1.001918310561  | 0.428948749050  | -1.139429871975 |
| H | 1.166911696503  | -2.063938579671 | 1.376626283433  |
| C | -1.121812029727 | 0.803334842525  | -1.388758213429 |
| H | -1.084534587609 | 0.799128829078  | -2.494184386545 |
| H | -2.091839890882 | 0.377760638411  | -1.076419650770 |

|   |                 |                |                 |
|---|-----------------|----------------|-----------------|
| H | -1.089366514409 | 1.853380913472 | -1.048306597166 |
| H | 0.058447669777  | 1.036441613929 | 1.126278961685  |

4)  $F_Z = -58$

**C<sub>3</sub>H<sub>6</sub>:**

|   |                 |                 |                 |
|---|-----------------|-----------------|-----------------|
| C | -0.092293117088 | 0.014278064230  | -0.682899194018 |
| C | 0.103799878317  | -0.014790457020 | 0.651286231336  |
| H | -0.266200474952 | -0.931603237048 | -1.214791657904 |
| H | 0.093110751593  | -0.955047151313 | 1.210459437893  |
| C | -0.097923364375 | 1.274203007664  | -1.521171156793 |
| H | 0.684531231874  | 1.234638245842  | -2.302312569076 |
| H | -1.069401972727 | 1.403598044940  | -2.034067916424 |
| H | 0.082362600785  | 2.164661709768  | -0.896085195416 |
| H | 0.276753224578  | 0.902957472445  | 1.224700380055  |

**BH<sub>3</sub>:**

|   |                |                 |                 |
|---|----------------|-----------------|-----------------|
| B | 2.011944345096 | -0.160103382323 | -0.000193085500 |
| H | 2.152232231782 | 0.920216865688  | 0.512131144929  |
| H | 1.852968893313 | -0.239227438573 | -1.196560824533 |
| H | 2.032862529791 | -1.161628045041 | 0.666653760434  |

**Q(A-M):**

|   |                 |                 |                 |
|---|-----------------|-----------------|-----------------|
| C | -0.123509207971 | 0.011698035607  | -0.661507168461 |
| C | -0.041606674461 | -0.093333079684 | 0.702657129158  |
| H | -0.306131980196 | -0.899874632095 | -1.240487895360 |
| H | -0.181534908914 | -1.052885226236 | 1.203241031009  |
| B | 1.855332805089  | -0.140009563700 | -0.054015368356 |
| H | 2.169568115409  | 1.025359973168  | 0.030283088789  |
| H | 1.994294374287  | -0.657024605682 | -1.148667192449 |
| H | 2.138539960478  | -0.882340352432 | 0.859498143208  |
| C | -0.184414102885 | 1.319132666664  | -1.418803035772 |
| H | 0.550549784846  | 1.332559669548  | -2.240896989320 |

|   |                 |                |                 |
|---|-----------------|----------------|-----------------|
| H | -1.193740588983 | 1.439288824000 | -1.853072671440 |
| H | 0.017789560100  | 2.171145455352 | -0.751484026715 |
| H | 0.025583862142  | 0.795757833572 | 1.336127952736  |

**TSM:**

|   |                 |                 |                 |
|---|-----------------|-----------------|-----------------|
| C | 0.079789000000  | 0.051665000000  | -0.716818000000 |
| C | 0.103481000000  | 0.049564000000  | 0.691603000000  |
| H | -0.173965000000 | -0.892520000000 | -1.206832000000 |
| H | -0.102613000000 | -0.861952000000 | 1.257266000000  |
| B | 1.762381000000  | -0.102913000000 | -0.131208000000 |
| H | 2.118548000000  | -1.211589000000 | -0.451939000000 |
| H | 1.814071000000  | -0.060629000000 | 1.113181000000  |
| H | 2.296216000000  | 0.908210000000  | -0.520817000000 |
| C | -0.167758000000 | 1.319332000000  | -1.519479000000 |
| H | 0.420026000000  | 1.316765000000  | -2.453329000000 |
| H | -1.238107000000 | 1.409590000000  | -1.782360000000 |
| H | 0.123713000000  | 2.210370000000  | -0.939175000000 |
| H | 0.023714000000  | 0.987127000000  | 1.249730000000  |

**PM:**

|   |                 |                 |                 |
|---|-----------------|-----------------|-----------------|
| C | 0.052933709616  | 0.083482996448  | -0.790328555764 |
| C | -0.020813760573 | -0.038994500705 | 0.766322372083  |
| H | -0.574799462729 | -0.729289494052 | -1.204973289979 |
| H | 0.312010950204  | -1.028850766746 | 1.123335548207  |
| B | 1.577523289837  | -0.161525844294 | -1.115928031667 |
| H | 2.019509174585  | -1.284295044392 | -1.211151235699 |
| H | 0.599313592632  | 0.730693926512  | 1.260928467351  |
| H | 2.342977631167  | 0.773208224378  | -1.212454491562 |
| C | -0.502764104951 | 1.448284240423  | -1.244234177676 |
| H | -0.464191122928 | 1.559594193791  | -2.344244017059 |
| H | -1.554356061491 | 1.579087257315  | -0.928842106513 |
| H | 0.086182175655  | 2.273327800500  | -0.804216461264 |



|   |                 |                |                |
|---|-----------------|----------------|----------------|
| H | -1.061924061551 | 0.108509081121 | 1.103660809559 |
|---|-----------------|----------------|----------------|

**TSAM:**

|   |                 |                 |                 |
|---|-----------------|-----------------|-----------------|
| C | -0.021398000000 | 0.046071000000  | -0.726192000000 |
| C | -0.033194000000 | 0.042694000000  | 0.685050000000  |
| H | -0.218981000000 | -0.897982000000 | -1.245155000000 |
| H | -0.291653000000 | -0.870024000000 | 1.222833000000  |
| B | 1.643816000000  | -0.056154000000 | 0.118886000000  |
| H | 2.154045000000  | 1.002061000000  | 0.399713000000  |
| H | 1.648554000000  | -0.106538000000 | -1.132464000000 |
| H | 2.051898000000  | -1.133586000000 | 0.475898000000  |
| C | -0.235717000000 | 1.318365000000  | -1.522748000000 |
| H | 0.247609000000  | 1.266277000000  | -2.512669000000 |
| H | -1.320400000000 | 1.473318000000  | -1.662556000000 |
| H | 0.171119000000  | 2.182637000000  | -0.973696000000 |
| H | -0.183879000000 | 0.985946000000  | 1.214494000000  |

**PAM:**

|   |                 |                 |                 |
|---|-----------------|-----------------|-----------------|
| C | 0.044233032724  | -0.000239829222 | -0.786065934229 |
| C | 0.014478740259  | -0.009637143687 | 0.771686529132  |
| H | 0.004423000337  | -1.039185771907 | -1.167355814267 |
| H | -0.948678123471 | -0.442420749868 | 1.098513228955  |
| B | 1.256266608533  | -0.864095328415 | 1.257027329587  |
| H | 2.338337252626  | -0.345377819096 | 1.404781570838  |
| H | 1.001927894660  | 0.429084738007  | -1.139258436390 |
| H | 1.166854732700  | -2.063880246083 | 1.377346694684  |
| C | -1.121781563034 | 0.803360652630  | -1.388821701045 |
| H | -1.084400409187 | 0.799188815286  | -2.494285113356 |
| H | -2.091826919050 | 0.377765738476  | -1.076572377029 |
| H | -1.089419525031 | 1.853392377034  | -1.048322511948 |
| H | 0.058358698013  | 1.036301896873  | 1.126464065058  |

5)  $F_x = 10$

**C<sub>3</sub>H<sub>6</sub>:**

|   |                 |                 |                 |
|---|-----------------|-----------------|-----------------|
| C | -0.092401628415 | 0.017206598686  | -0.681838746427 |
| C | 0.102991599324  | -0.015048296251 | 0.652871035349  |
| H | -0.266918388539 | -0.927659119343 | -1.214581017477 |
| H | 0.090288743721  | -0.957898494989 | 1.208532844503  |
| C | -0.096795129153 | 1.275031233683  | -1.520643478277 |
| H | 0.682816108439  | 1.229462713167  | -2.302614860796 |
| H | -1.066732453503 | 1.400955386413  | -2.034477905348 |
| H | 0.085340052302  | 2.167679605762  | -0.898565048130 |
| H | 0.276151095796  | 0.903165372870  | 1.226434176603  |

**BH<sub>3</sub>:**

|   |                |                 |                 |
|---|----------------|-----------------|-----------------|
| B | 2.010954643816 | -0.160110012728 | -0.004789725657 |
| H | 2.153232079949 | 0.918423752574  | 0.514456592338  |
| H | 1.851637257882 | -0.239789222699 | -1.196735228017 |
| H | 2.034184018138 | -1.159265518393 | 0.669099313527  |

**Q(A-M):**

|   |             |             |             |
|---|-------------|-------------|-------------|
| C | -0.11298754 | 0.00876135  | -0.66739123 |
| C | -0.03232802 | -0.07815052 | 0.69980311  |
| H | -0.28798598 | -0.91041321 | -1.23620341 |
| H | -0.17932239 | -1.03080535 | 1.21098061  |
| B | 1.84830830  | -0.13807833 | -0.02404266 |
| H | 2.18429590  | 1.01308091  | 0.14486630  |
| H | 1.98387663  | -0.56036893 | -1.15732985 |
| H | 2.14320771  | -0.96170135 | 0.81585507  |
| C | -0.18642697 | 1.30720840  | -1.43589647 |
| H | 0.49820600  | 1.29598462  | -2.29887246 |
| H | -1.21563573 | 1.43750255  | -1.81559101 |
| H | 0.06514742  | 2.16340335  | -0.79077280 |
| H | 0.01236567  | 0.82304950  | 1.31746782  |

**TSM:**

|   |                 |                 |                 |
|---|-----------------|-----------------|-----------------|
| C | 0.098634136975  | 0.050480389205  | -0.727444242953 |
| C | 0.117506338189  | 0.047708400141  | 0.686038985548  |
| H | -0.165252831429 | -0.892181335288 | -1.214657557893 |
| H | -0.103308016739 | -0.862464645532 | 1.248882094825  |
| B | 1.762136655515  | -0.105710183445 | -0.142173171094 |
| H | 2.131761671452  | -1.220019746655 | -0.421566876193 |
| H | 1.775643275565  | -0.050003097983 | 1.111441304835  |
| H | 2.316220701886  | 0.903777437320  | -0.503247664787 |
| C | -0.170763336178 | 1.321238455056  | -1.519241332284 |
| H | 0.378166045302  | 1.315176962907  | -2.474966114952 |
| H | -1.248925269212 | 1.417493415623  | -1.741496234656 |
| H | 0.149095486085  | 2.210209199150  | -0.950117361278 |
| H | 0.018582142589  | 0.987312749497  | 1.238369170880  |

**PM:**

|   |                 |                 |                 |
|---|-----------------|-----------------|-----------------|
| C | 0.052580161129  | 0.084589334003  | -0.791519714902 |
| C | -0.020669208803 | -0.039841723237 | 0.763281984499  |
| H | -0.574109102832 | -0.727239467488 | -1.207684449978 |
| H | 0.313452357624  | -1.030623183130 | 1.119013390443  |
| B | 1.577961949469  | -0.161645186512 | -1.119978004224 |
| H | 2.020092448870  | -1.285209021831 | -1.200407239719 |
| H | 0.600461121206  | 0.730888907731  | 1.257253614661  |
| H | 2.345215390256  | 0.772475913008  | -1.204748454201 |
| C | -0.504001764016 | 1.449248813211  | -1.243660380299 |
| H | -0.474652552236 | 1.556807705544  | -2.342481545330 |
| H | -1.553490431048 | 1.581479847775  | -0.922026058242 |
| H | 0.090573394174  | 2.274821225664  | -0.811163000394 |
| H | -1.061809764280 | 0.107480835332  | 1.101993857535  |

**TSAM:**

|   |                 |                |                 |
|---|-----------------|----------------|-----------------|
| C | -0.035326222110 | 0.050548710618 | -0.726658152687 |
|---|-----------------|----------------|-----------------|

|   |                 |                 |                 |
|---|-----------------|-----------------|-----------------|
| C | -0.036302128158 | 0.044170161982  | 0.680720905990  |
| H | -0.218768797011 | -0.894896298294 | -1.247529123235 |
| H | -0.288922360871 | -0.870178600446 | 1.218731664660  |
| B | 1.651664898740  | -0.060366581867 | 0.109895903309  |
| H | 2.159206041785  | 0.992507633378  | 0.421729381522  |
| H | 1.681777708807  | -0.105809754277 | -1.133809420637 |
| H | 2.048871067740  | -1.136298504705 | 0.490013776606  |
| C | -0.242871264609 | 1.320928653736  | -1.524926807694 |
| H | 0.229216893188  | 1.261007857114  | -2.518083894862 |
| H | -1.327798237579 | 1.477900979984  | -1.658587165302 |
| H | 0.171014210010  | 2.185980102506  | -0.982273376285 |
| H | -0.179943809964 | 0.987589640265  | 1.212172308576  |

**PAM:**

|   |             |             |             |
|---|-------------|-------------|-------------|
| C | 0.04321562  | -0.00376858 | -0.78969255 |
| C | 0.01479588  | -0.01183540 | 0.77119543  |
| H | -0.00197206 | -1.04207697 | -1.16941774 |
| H | -0.94849637 | -0.44723070 | 1.09478831  |
| B | 1.25634957  | -0.86123679 | 1.25168566  |
| H | 2.33521353  | -0.33896767 | 1.42287265  |
| H | 1.00165120  | 0.42104111  | -1.14458754 |
| H | 1.17555572  | -2.06259038 | 1.37301971  |
| C | -1.12125179 | 0.80545155  | -1.38652272 |
| H | -1.08728007 | 0.79988950  | -2.49006638 |
| H | -2.09202198 | 0.38363044  | -1.07193505 |
| H | -1.08147935 | 1.85584935  | -1.04770347 |
| H | 0.05449609  | 1.03610155  | 1.12149969  |

**6)  $F_x = -10$**

**$C_3H_6$ :**

|   |                 |                |                 |
|---|-----------------|----------------|-----------------|
| C | -0.097095121407 | 0.017505478493 | -0.681244626717 |
|---|-----------------|----------------|-----------------|

|   |                 |                 |                 |
|---|-----------------|-----------------|-----------------|
| C | 0.101563760512  | -0.015047336669 | 0.652882569013  |
| H | -0.267353134448 | -0.927868586883 | -1.214492315380 |
| H | 0.096657402213  | -0.958485533990 | 1.207622606758  |
| C | -0.098744693294 | 1.275323316255  | -1.520357827909 |
| H | 0.684990804396  | 1.229878144420  | -2.297812222850 |
| H | -1.066232571108 | 1.401102969817  | -2.039536112900 |
| H | 0.081019649804  | 2.168031427374  | -0.897792855715 |
| H | 0.279932902657  | 0.902455121181  | 1.225849785733  |

**BH<sub>3</sub>:**

|   |                |                 |                 |
|---|----------------|-----------------|-----------------|
| B | 2.014052911813 | -0.160241022488 | -0.004190318057 |
| H | 2.151902891226 | 0.919298677852  | 0.513669676674  |
| H | 1.851371507142 | -0.239669563449 | -1.196015530551 |
| H | 2.032680689822 | -1.160130091832 | 0.668566170330  |

**Q(A-M):**

|   |                 |                 |                 |
|---|-----------------|-----------------|-----------------|
| C | -0.120079970203 | 0.009291033273  | -0.665657933627 |
| C | -0.037942057301 | -0.080883673530 | 0.700293214682  |
| H | -0.293300553376 | -0.908684847720 | -1.237110950801 |
| H | -0.178357554203 | -1.035485342258 | 1.209903404419  |
| B | 1.858068718976  | -0.138467432804 | -0.029877733808 |
| H | 2.180529652806  | 1.017254148821  | 0.126676352042  |
| H | 1.983811302601  | -0.576311236399 | -1.157530478649 |
| H | 2.143550758330  | -0.949161326319 | 0.824699168115  |
| C | -0.186763490763 | 1.309113549349  | -1.432910997243 |
| H | 0.509963158354  | 1.300908382140  | -2.286181153439 |
| H | -1.210873047276 | 1.439461294739  | -1.826911995002 |
| H | 0.056160763113  | 2.164525624283  | -0.783418610448 |
| H | 0.015953319010  | 0.817913826429  | 1.320900713854  |

**TSM:**

|   |            |            |             |
|---|------------|------------|-------------|
| C | 0.09296727 | 0.05076435 | -0.72517901 |
| C | 0.11626133 | 0.04780637 | 0.68717489  |

|   |             |             |             |
|---|-------------|-------------|-------------|
| H | -0.16580898 | -0.89243340 | -1.21408713 |
| H | -0.10047326 | -0.86283868 | 1.25083154  |
| B | 1.76168138  | -0.10543660 | -0.13959237 |
| H | 2.12475467  | -1.21954296 | -0.42560569 |
| H | 1.78469550  | -0.05050410 | 1.11232188  |
| H | 2.30835081  | 0.90489677  | -0.50708208 |
| C | -0.16999728 | 1.32092396  | -1.51962818 |
| H | 0.38897196  | 1.31593652  | -2.46941462 |
| H | -1.24641775 | 1.41612495  | -1.75300681 |
| H | 0.14341845  | 2.21017520  | -0.94748827 |
| H | 0.02109191  | 0.98714763  | 1.24057585  |

**PM:**

|   |             |             |             |
|---|-------------|-------------|-------------|
| C | 0.05344605  | 0.08474672  | -0.78927561 |
| C | -0.02281760 | -0.04014046 | 0.76456987  |
| H | -0.57192879 | -0.72742504 | -1.20776239 |
| H | 0.31164512  | -1.03081378 | 1.11989651  |
| B | 1.58019671  | -0.16100583 | -1.12183877 |
| H | 2.02024542  | -1.28500112 | -1.19564894 |
| H | 0.59843305  | 0.72948737  | 1.25967746  |
| H | 2.34348278  | 0.77364923  | -1.21906239 |
| C | -0.50301093 | 1.44906406  | -1.24254545 |
| H | -0.46978985 | 1.55741817  | -2.34125594 |
| H | -1.55393171 | 1.58105159  | -0.92349863 |
| H | 0.09004331  | 2.27471325  | -0.80850933 |
| H | -1.06441255 | 0.10748685  | 1.10312862  |

**TSAM:**

|   |                 |                 |                 |
|---|-----------------|-----------------|-----------------|
| C | -0.038553835843 | 0.049837948032  | -0.724896088584 |
| C | -0.041578835697 | 0.044005072837  | 0.680774568348  |
| H | -0.218850638379 | -0.895855695348 | -1.246389210123 |
| H | -0.284119029127 | -0.871218817417 | 1.221862795714  |

|   |                 |                 |                 |
|---|-----------------|-----------------|-----------------|
| B | 1.653178009606  | -0.059698374221 | 0.103557307511  |
| H | 2.151672950616  | 0.994823389137  | 0.421454079315  |
| H | 1.689557030935  | -0.105977888185 | -1.138287019027 |
| H | 2.043041804690  | -1.135130502481 | 0.490463694817  |
| C | -0.242999786682 | 1.320359405089  | -1.524112730527 |
| H | 0.231937668726  | 1.259530494559  | -2.515791140360 |
| H | -1.327428543115 | 1.480603653346  | -1.660520197206 |
| H | 0.172688953454  | 2.184513440716  | -0.981384644328 |
| H | -0.176726748733 | 0.987292874590  | 1.214663585504  |

**PAM:**

|   |             |             |             |
|---|-------------|-------------|-------------|
| C | 0.04625908  | 0.00155619  | -0.79066804 |
| C | 0.01711849  | -0.01066765 | 0.76941047  |
| H | 0.00951660  | -1.03577408 | -1.17414958 |
| H | -0.94863299 | -0.44173560 | 1.09281424  |
| B | 1.25586837  | -0.86578797 | 1.25296235  |
| H | 2.33952248  | -0.35097446 | 1.40536635  |
| H | 1.00143576  | 0.43427806  | -1.14304934 |
| H | 1.16117958  | -2.06339023 | 1.39728100  |
| C | -1.12371769 | 0.80319224  | -1.38694010 |
| H | -1.08743137 | 0.80265030  | -2.49053050 |
| H | -2.09185842 | 0.37180252  | -1.07550349 |
| H | -1.09313064 | 1.85265036  | -1.04392550 |
| H | 0.06264273  | 1.03645732  | 1.12206814  |

## 2. The number of imaginary frequencies of structures:

**Table S1.** The number of imaginary frequencies of stationary points in hydroboration reaction of C<sub>2</sub>H<sub>4</sub> with and without OEEF.

|                               | OEEF | Q | TS <sup>[a]</sup> | P |
|-------------------------------|------|---|-------------------|---|
|                               | 0    | 0 | 1 (-480.42 i)     | 0 |
| F <sub>Z</sub> <sup>[b]</sup> | 20   | 0 | 1 (-439.44 i)     | 0 |
|                               | 40   | 0 | 1 (-388.18 i)     | 0 |
|                               | 60   | 0 | 1 (-322.81 i)     | 0 |
|                               | 80   | 0 | 1 (-216.06 i)     | 0 |
|                               | -10  | 0 | 1 (-499.94 i)     | 0 |
|                               | -15  | 0 | 1 (-509.08 i)     | 0 |
|                               | -20  | 0 | 1 (-517.93 i)     | 0 |
| F <sub>X</sub> <sup>[c]</sup> | 20   | 0 | 1 (-505.11 i)     | 0 |
|                               | -20  | 0 | 1 (-453.91 i)     | 0 |

[a] The values of imaginary frequencies of TSs are listed in brackets, and the unit is given in cm<sup>-1</sup>; [b] represents the external electric field is oriented to parallel the direction of C=C bond, and [c] is perpendicular to C=C bond.



**Table S2.** The number of imaginary frequencies of stationary points in hydroboration reaction of C<sub>3</sub>H<sub>6</sub> with and without OEEF.

|                               | OEEF | Q(A-M) | TSM <sup>[a]</sup> | PM | TSAM <sup>[a]</sup> | PAM |
|-------------------------------|------|--------|--------------------|----|---------------------|-----|
| F <sub>Z</sub> <sup>[b]</sup> | 0    | 0      | 1 (-617.32 i)      | 0  | 1 (-471.51 i)       | 0   |
|                               | 10   | 0      | 1 (-630.05 i)      | 0  | 1 (-454.73 i)       | 0   |
|                               | 30   | 0      | 1 (-653.44 i)      | 0  | 1 (-416.63 i)       | 0   |
|                               | 50   | 0      | 1 (-675.89 i)      | 0  | 1 (-372.30 i)       | 0   |
|                               | 70   | 0      | 1 (-696.82 i)      | 0  | 1 (-318.21 i)       | 0   |
|                               | -10  | 0      | 1 (-605.38 i)      | 0  | 1 (-487.73 i)       | 0   |
|                               | -30  | 0      | 1 (-577.33 i)      | 0  | 1 (-517.68 i)       | 0   |
|                               | -50  | 0      | 1 (-549.96 i)      | 0  | 1 (-545.35 i)       | 0   |
|                               | -55  | 0      | 1 (-542.14 i)      | 0  | 1 (-551.92 i)       | 0   |
|                               | -56  | 0      | 1 (-542.28 i)      | 0  | 1 (-555.97 i)       | 0   |
|                               | -57  | 0      | 1 (-538.00 i)      | 0  | 1 (-555.90 i)       | 0   |
|                               | -58  | 0      | 1 (-538.15 i)      | 0  | 1 (-555.83 i)       | 0   |
|                               | -59  | 0      | 1 (-538.29 i)      | 0  | 1 (-555.75 i)       | 0   |
|                               | -60  | 0      | 1 (-533.75 i)      | 0  | 1 (-558.36 i)       | 0   |
| F <sub>X</sub> <sup>[c]</sup> | -70  | 0      | 1 (-519.51 i)      | 0  | 1 (-570.06 i)       | 0   |
|                               | 10   | 0      | 1 (-626.41 i)      | 0  | 1 (-482.71 i)       | 0   |
|                               | -10  | 0      | 1 (-609.13 i)      | 0  | 1 (-460.18 i)       | 0   |

[a] The values of imaginary frequencies of TSMs and TSAMs are respectively listed in brackets, and the unit is given in cm<sup>-1</sup>; [b] represents the external electric field is oriented to parallel the direction of C=C bond, and [c] is perpendicular to C=C bond.

### 3. Computed total electronic energies (with ZPE) of optimized structures:

**Table S3.** The total electronic energies (with ZPE) of stationary points in hydroboration reaction of C<sub>2</sub>H<sub>4</sub> with and without OEEF.

| OEEF<br>Total energy<br>(with ZPE) | <b>0</b>                  | <b>20</b> <sup>[a]</sup>  | <b>40</b> <sup>[a]</sup>  | <b>60</b> <sup>[a]</sup> | <b>80</b> <sup>[a]</sup>  |
|------------------------------------|---------------------------|---------------------------|---------------------------|--------------------------|---------------------------|
| BH <sub>3</sub>                    | -26.4848024               | -26.484844                | -26.484961                | -26.4851683              | -26.485456                |
| C <sub>2</sub> H <sub>4</sub>      | -78.3072254               | -78.307297                | -78.307515                | -78.3078795              | -78.30839                 |
| Q                                  | -104.7998707              | -104.799978               | -104.800325               | -104.8010709             | -104.801911               |
| TS                                 | -104.7981522              | -104.798913               | -104.799833               | -104.8009093             | -104.802143               |
| P                                  | -104.8376414              | -104.837933               | -104.838409               | -104.8390698             | -104.839916               |
|                                    | <b>-10</b> <sup>[a]</sup> | <b>-15</b> <sup>[a]</sup> | <b>-20</b> <sup>[a]</sup> | <b>20</b> <sup>[b]</sup> | <b>-20</b> <sup>[b]</sup> |
| BH <sub>3</sub>                    | -26.484813                | -26.484826                | -26.484844                | -26.484829               | -26.484829                |
| C <sub>2</sub> H <sub>4</sub>      | -78.307242                | -78.307265                | -78.307297                | -78.307274               | -78.307274                |
| Q                                  | -104.799916               | -104.799946               | -104.800004               | -104.8021                | -104.797894               |
| TS                                 | -104.797831               | -104.797685               | -104.797549               | -104.800203              | -104.796306               |
| P                                  | -104.837563               | -104.837542               | -104.837532               | -104.838176              | -104.837294               |

[a] The energies of stationary points are calculated when the OEEF parallel to the direction of C=C bond; [b] The energies of stationary points are calculated when the OEEF are perpendicular to the direction of C=C bond.

**Table S4.** The total electronic energies (with ZPE) of stationary points in hydroboration reaction of C<sub>3</sub>H<sub>6</sub> with and without OEEF.

| OEEF                          |                          |                          |                          |                          |                          |
|-------------------------------|--------------------------|--------------------------|--------------------------|--------------------------|--------------------------|
| Total energy<br>(with ZPE)    | <b>0</b>                 | <b>10<sup>[a]</sup></b>  | <b>30<sup>[a]</sup></b>  | <b>50<sup>[a]</sup></b>  | <b>70<sup>[a]</sup></b>  |
| BH <sub>3</sub>               | -26.484802               | -26.48481                | -26.484889               | -26.48505                | -26.4853                 |
| C <sub>3</sub> H <sub>6</sub> | -117.481994              | -117.4821                | -117.4826                | -117.4833                | -117.4841                |
| Q(A-M)                        | -143.977575              | -143.9778                | -143.97844               | -143.9793                | -143.9805                |
| TSM                           | -143.971721              | -143.9715                | -143.97111               | -143.971                 | -143.9711                |
| PM                            | -144.009519              | -144.0095                | -144.00958               | -144.0099                | -144.0104                |
| TSAM                          | -143.975918              | -143.9764                | -143.97751               | -143.9788                | -143.9804                |
| PAM                           | -144.009529              | -144.0097                | -144.01018               | -144.0109                | -144.0119                |
|                               | <b>-10<sup>[a]</sup></b> | <b>-30<sup>[a]</sup></b> | <b>-50<sup>[a]</sup></b> | <b>-60<sup>[a]</sup></b> | <b>-70<sup>[a]</sup></b> |
| BH <sub>3</sub>               | -26.484813               | -26.48489                | -26.485056               | -26.48517                | -26.48531                |
| C <sub>3</sub> H <sub>6</sub> | -117.481894              | -117.4819                | -117.48202               | -117.4822                | -117.4824                |
| Q(A-M)                        | -143.977469              | -143.9774                | -143.97769               | -143.9779                | -143.9782                |
| TSM                           | -143.972037              | -143.9728                | -143.97386               | -143.9745                | -143.9751                |
| PM                            | -144.009614              | -144.01                  | -144.01057               | -144.0109                | -144.0114                |
| TSAM                          | -143.9755                | -143.9748                | -143.9744                | -143.9743                | -143.9742                |
| PAM                           | -144.009429              | -144.0094                | -144.00963               | -144.0098                | -144.0101                |
|                               | <b>-55<sup>[a]</sup></b> | <b>-56<sup>[a]</sup></b> | <b>-57<sup>[a]</sup></b> | <b>-58<sup>[a]</sup></b> | <b>-59<sup>[a]</sup></b> |
| BH <sub>3</sub>               | -26.485111               | -26.48512                | -26.485134               | -26.48515                | -26.48516                |
| C <sub>3</sub> H <sub>6</sub> | -117.482088              | -117.4821                | -117.48212               | -117.4821                | -117.4822                |
| Q(A-M)                        | -143.977783              | -143.9778                | -143.97783               | -143.9779                | -143.9779                |
| TSM                           | -143.974154              | -143.9742                | -143.97427               | -143.9743                | -143.9744                |
| PM                            | -144.010752              | -144.0108                | -144.01083               | -144.0109                | -144.0109                |
| TSAM                          | -143.974323              | -143.9743                | -143.9743                | -143.9743                | -143.9743                |
| PAM                           | -144.009724              | -144.0097                | -144.00977               | -144.0098                | -144.0098                |
|                               | <b>10<sup>[b]</sup></b>  | <b>-10<sup>[b]</sup></b> |                          |                          |                          |
| BH <sub>3</sub>               | -26.484804               | -26.484804               |                          |                          |                          |
| C <sub>3</sub> H <sub>6</sub> | -117.482025              | -117.481999              |                          |                          |                          |
| Q(A-M)                        | -143.978745              | -143.976486              |                          |                          |                          |
| TSM                           | -143.972723              | -143.970783              |                          |                          |                          |
| PM                            | -144.009771              | -144.009328              |                          |                          |                          |
| TSAM                          | -143.977003              | -143.974894              |                          |                          |                          |
| PAM                           | -144.009739              | -144.009383              |                          |                          |                          |

[a] The energies of stationary points are calculated when the OEEF parallel to the direction of C=C bond; [b] The energies of stationary points are calculated when the OEEF are perpendicular to the direction of C=C bond.

#### 4. Computed relative energies (with ZPE) of optimized structures:

**Table S5.** The relative energies of stationary points along potential surface in hydroboration of C<sub>2</sub>H<sub>4</sub> and the dipole moment of C<sub>2</sub>H<sub>4</sub> with and without OEEF when the electric field is along -F<sub>Z</sub>.

| F <sub>Z</sub> <sup>[a]</sup> | Q <sup>[b]</sup> | TS <sup>[b]</sup> | P <sup>[b]</sup> | μ <sup>[c]</sup> |
|-------------------------------|------------------|-------------------|------------------|------------------|
| -10                           | -20.64           | -15.16            | -119.48          | 0.09             |
| -15                           | -20.62           | -14.69            | -119.33          | 0.13             |
| -20                           | -20.64           | -14.20            | -119.17          | 0.18             |

[a] F<sub>Z</sub> is given in the unit of (×10<sup>-4</sup>) a.u.; [b] The relative energies of Q, TS, and P is given in kJ/mol; [c] The dipole moment is given in Debye (D).

**Table S6.** The relative energies of stationary points along potential surface in hydroboration of C<sub>2</sub>H<sub>4</sub> and the dipole moment of C<sub>2</sub>H<sub>4</sub> with and without OEEF when the electric field is along F<sub>X</sub> and -F<sub>X</sub>.

| F <sub>X</sub> <sup>[a]</sup> | Q <sup>[b]</sup> | TS <sup>[b]</sup> | P <sup>[b]</sup> | μ <sup>[c]</sup> |
|-------------------------------|------------------|-------------------|------------------|------------------|
| 0                             | -20.59           | -16.08            | -119.76          | 0.000            |
| 20                            | -26.25           | -21.27            | -120.96          | 0.002            |
| -20                           | -15.20           | -11.03            | -118.65          | -0.002           |

[a] F<sub>X</sub> is given in the unit of (×10<sup>-4</sup>) a.u.; [b] The relative energies of Q, TS, and P is given in kJ/mol; [c] The dipole moment is given in Debye (D), and the number of digits is given in three due to they are too close to zero.

**Table S7.** The relative energies of stationary points along potential surface in hydroboration of C<sub>3</sub>H<sub>6</sub> and the dipole moment of C<sub>3</sub>H<sub>6</sub> with and without OEEF when the electric field is along F<sub>X</sub> and -F<sub>X</sub>.

| F <sub>X</sub> <sup>[a]</sup> | Q(A-M) <sup>[b]</sup> | TSM <sup>[b]</sup> | PM <sup>[b]</sup> | TSAM <sup>[b]</sup> | PAM <sup>[b]</sup> | μ <sup>[c]</sup> |
|-------------------------------|-----------------------|--------------------|-------------------|---------------------|--------------------|------------------|
| 0                             | -28.3                 | -12.93             | -112.17           | -23.95              | -112.2             | -0.32            |
| 10                            | -31.2855              | -15.4747           | -112.744          | -26.7118            | -112.66            | -0.32            |
| -10                           | -25.4227              | -10.4495           | -111.649          | -21.2429            | -111.794           | -0.31            |

[a] F<sub>X</sub> is given in the unit of (×10<sup>-4</sup>) a.u.; [b] The relative energies of Q, TS, and P is given in kJ/mol; [c] The dipole moment is given in Debye (D).

**5. Variations of charge quantity of carbon atoms with the change of electric field in hydroboration reactions of  $C_3H_6$  with  $BH_3$ :**

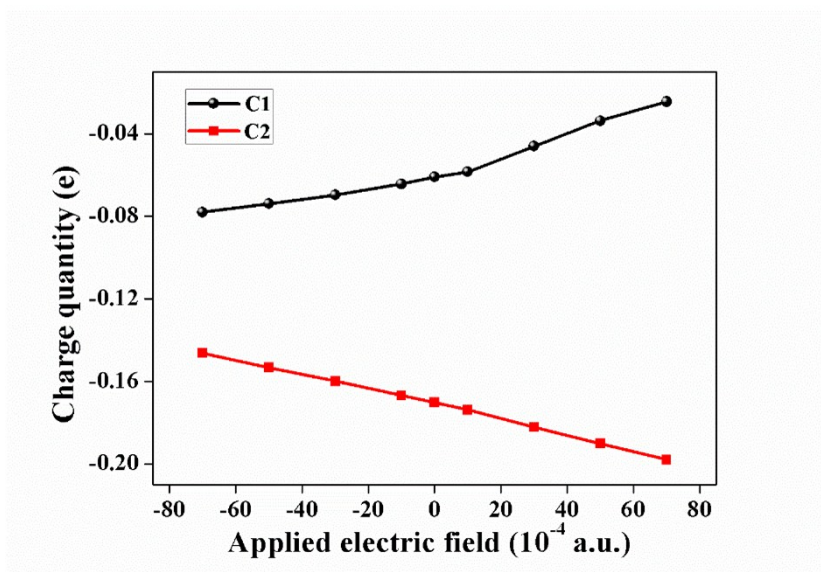

**Fig. S1** The variations of charge quantity of carbon atoms with the change of electric field in the hydroboration reactions of  $C_3H_6$  with  $BH_3$ .

**6. Frontier molecular orbitals of stationary points along potential energy surface in hydroboration reactions of  $C_3H_6$  with  $BH_3$ :**

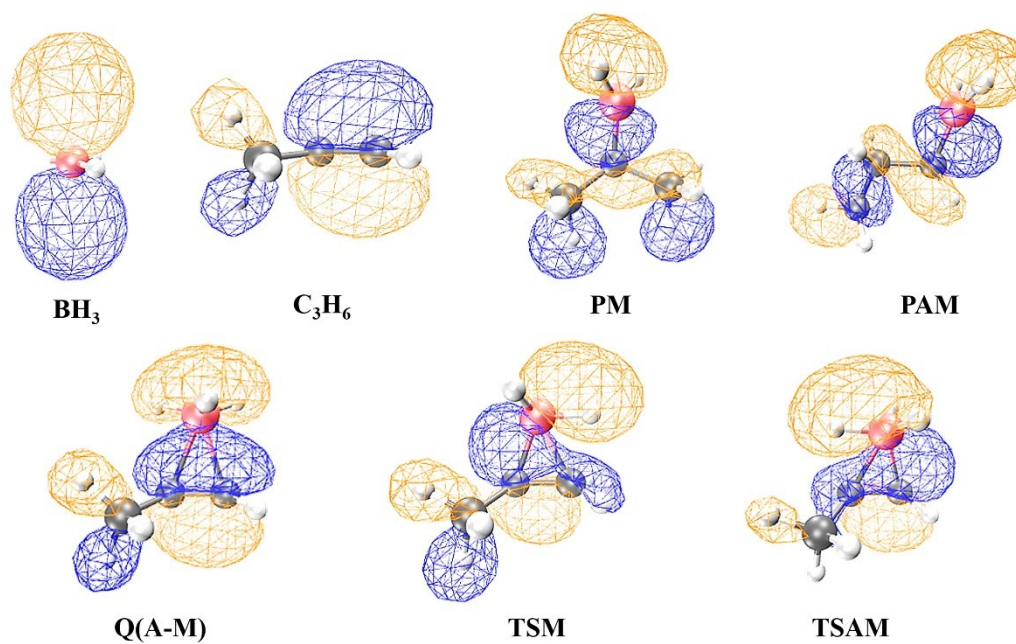

**Fig. S2** The frontier molecular orbitals of the stationary points along potential energy surface in the hydroboration reactions of  $C_3H_6$  with  $BH_3$ . Noted: The Isovalves are set for 0.03; Orange color represents the positive, and blue color represents the negative; Except the  $BH_3$  molecule, all of the frontier molecular orbitals are given in their HOMO.



**7. Frontier molecular orbitals of precursor complex Q(A-M) along potential energy surface in hydroboration reactions of C<sub>3</sub>H<sub>6</sub> with BH<sub>3</sub> in presence of field:**

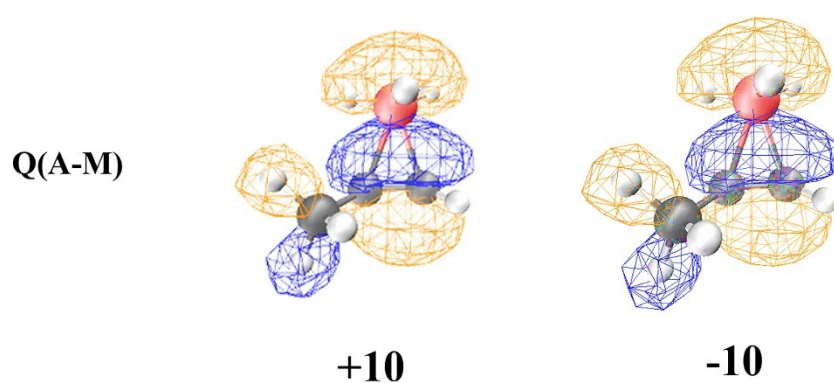

**Fig. S3** Frontier molecular orbitals of precursor complex Q(A-M) along potential energy surface in hydroboration reactions of C<sub>3</sub>H<sub>6</sub> with BH<sub>3</sub> as  $F_x = \pm 10 (\times 10^{-4})$  a.u.
